# Supplementary material for: An Objective Method with a Continuity Constraint for Improving Surface Velocity Estimates from the Geostationary Ocean Color Imager
Source: MDPI journal article supplement (doi:10.3390/rs14010014), 2021-12-21
Supplement: s1 [file s1]

# An Objective Method with a Continuity Constraint for Improving Surface Velocity Estimates from the Geostationary Ocean Color Imager

Zifeng Hu <sup>1,2,\*</sup>, Lan Li <sup>1,2</sup>, Jun Zhao <sup>1,2,3,4</sup> and Dongxiao Wang <sup>1,2</sup>

<sup>1</sup> School of Marine Sciences, Sun Yat-sen University, Zhuhai 519082, China; lilan28@mail.sysu.edu.cn (L.L.); zhaojun28@mail.sysu.edu.cn (J.Z.); dxwang@mail.sysu.edu.cn (D.W.)

<sup>2</sup> Southern Marine Science and Engineering Guangdong Laboratory (Zhuhai), Zhuhai 519080, China

<sup>3</sup> Guangdong Provincial Key Laboratory of Marine Resources and Coastal Engineering, Guangzhou 510275, China

<sup>4</sup> Pearl River Estuary Marine Ecosystem Research Station, Ministry of Education, Zhuhai 519000, China

\* Correspondence: huzifeng@mail.sysu.edu.cn

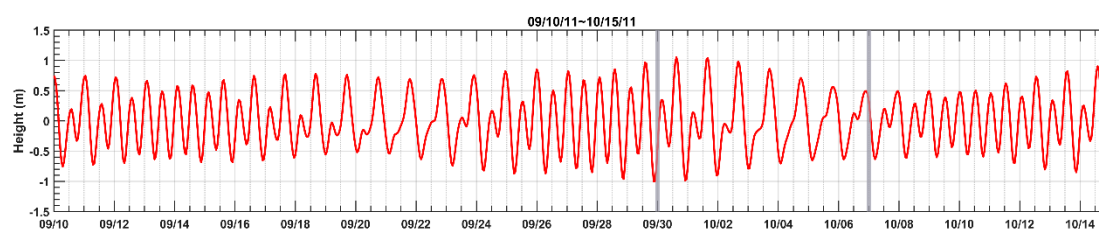

**Figure S1.** The hourly tidal heights at (122°E, 31°N) from 10 September to 15 October 2011. The start time for each case during spring and neap tides is marked by a bold gray line. The time is in Greenwich.

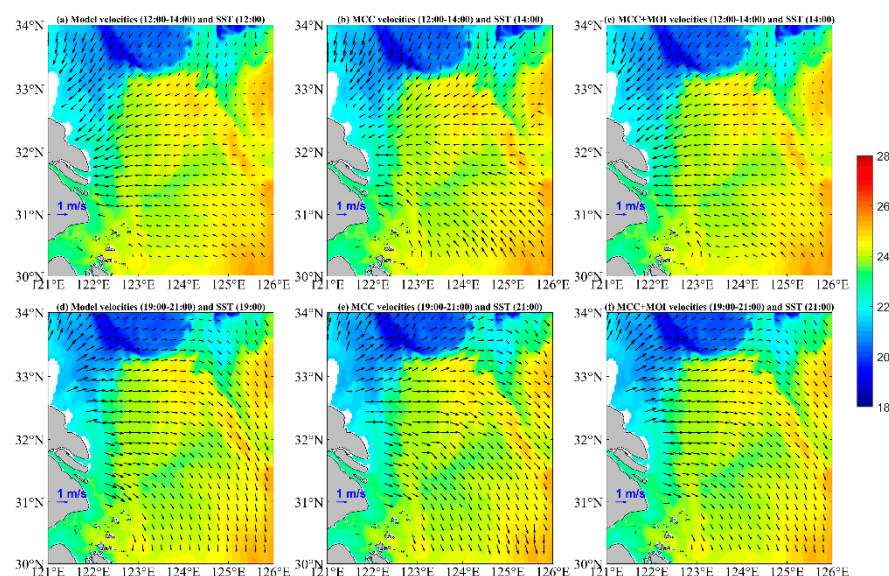

**Figure S2.** The averaged velocity fields from model (left), MCC (middle), and MCC+MOI (right) for 12:00–14:00 UTC and 19:00–21:00 UTC on 30 September 2011 (**during spring tide**), overlying with the MITgcm model SST for 12:00 UTC (a), 14:00 UTC (b–c), 19:00 UTC (d), and 21:00 UTC (e–f).

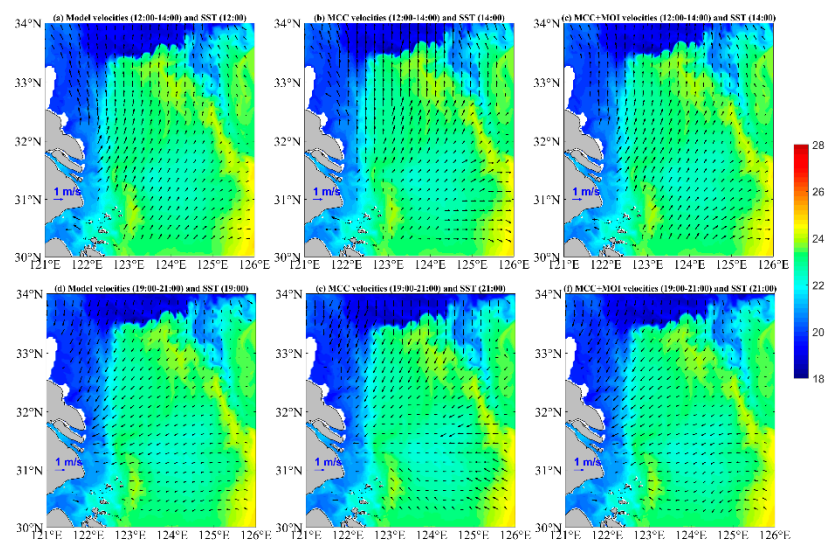

Figure S3. Same as Figure. S2, but for 7 October 2011 (during neap tide).

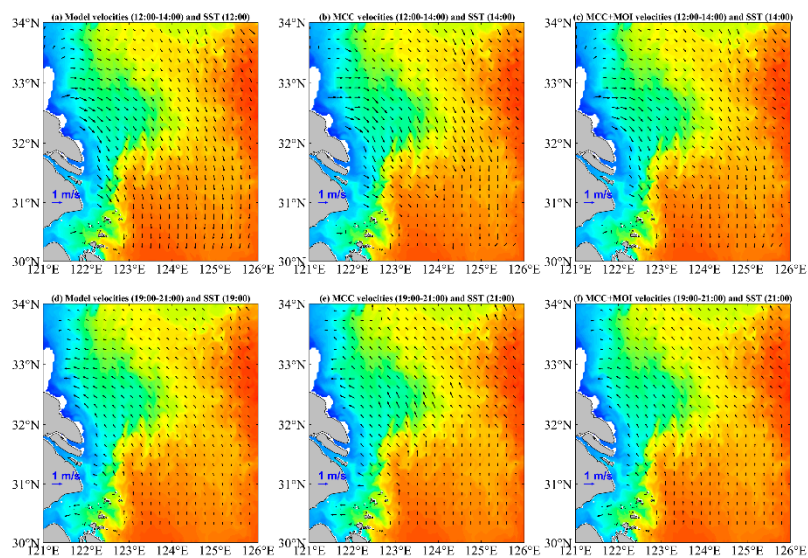

Figure S4. Same as Figure. S2, but for 1 January 2012 (in winter).

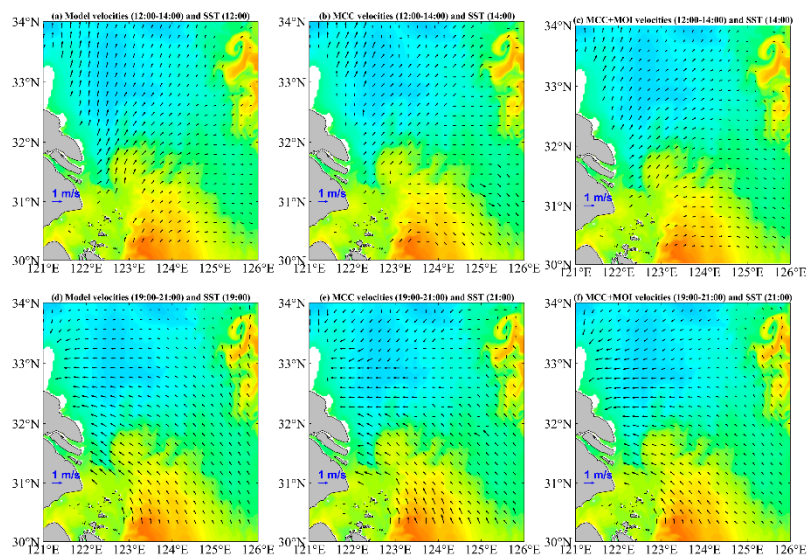

**Figure S5.** Same as Figure. S2, but for 1 April 2012 (in spring).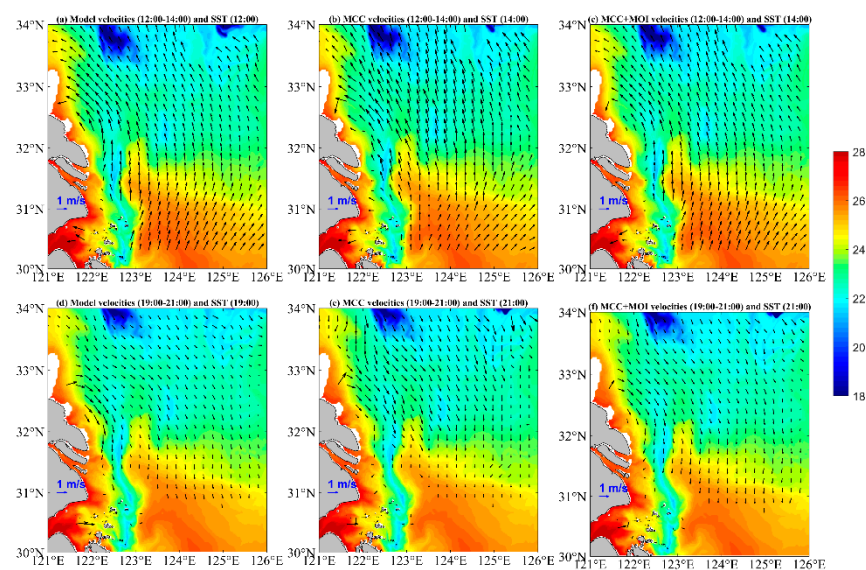**Figure S6.** Same as Figure. S2, but for 1 July 2012 (in summer).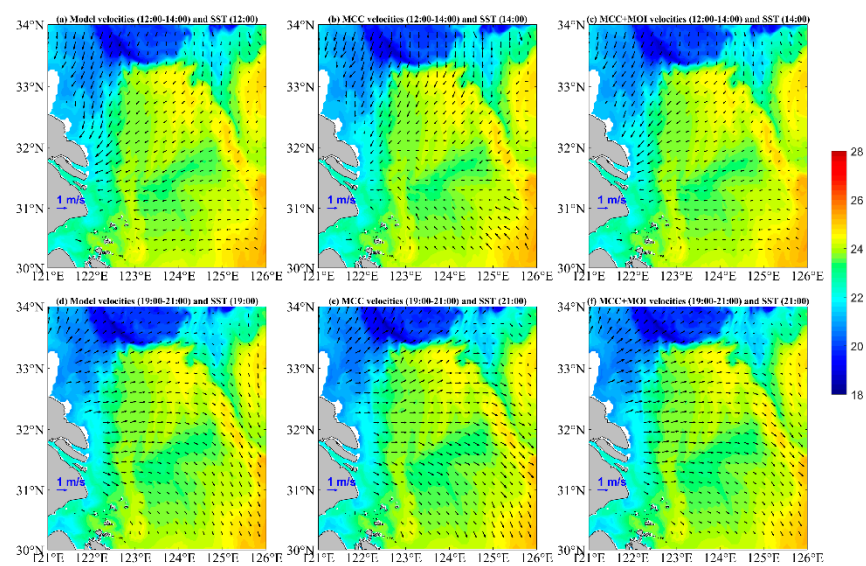**Figure S7.** Same as Figure. S2, but for 1 October 2011 (in autumn).

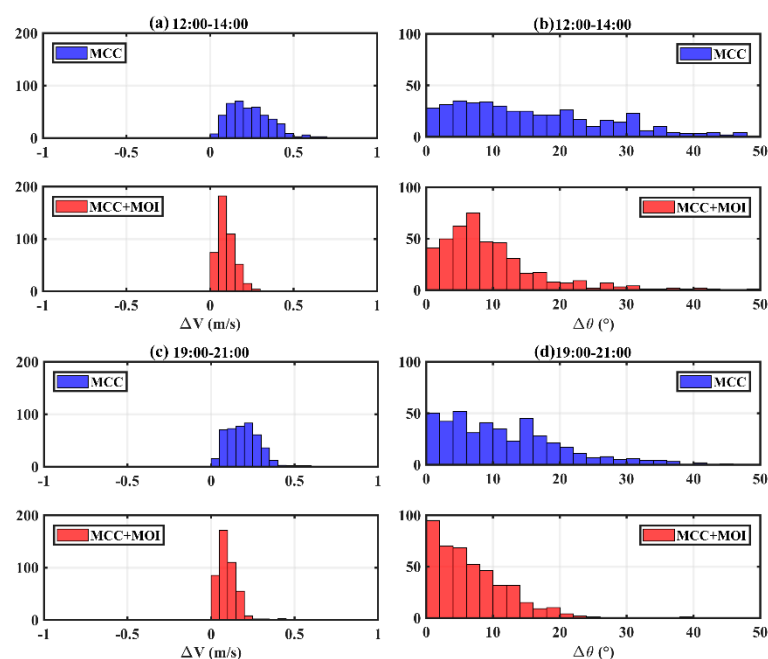

**Figure S8.** Histograms of magnitude and angle differences between the MITgcm model velocities and those from either MCC or MCC+MOI on 30 September 2011 (during spring tide). For this histogram comparison, the total number of model vectors equals those estimated using MCC and MCC+MOI.

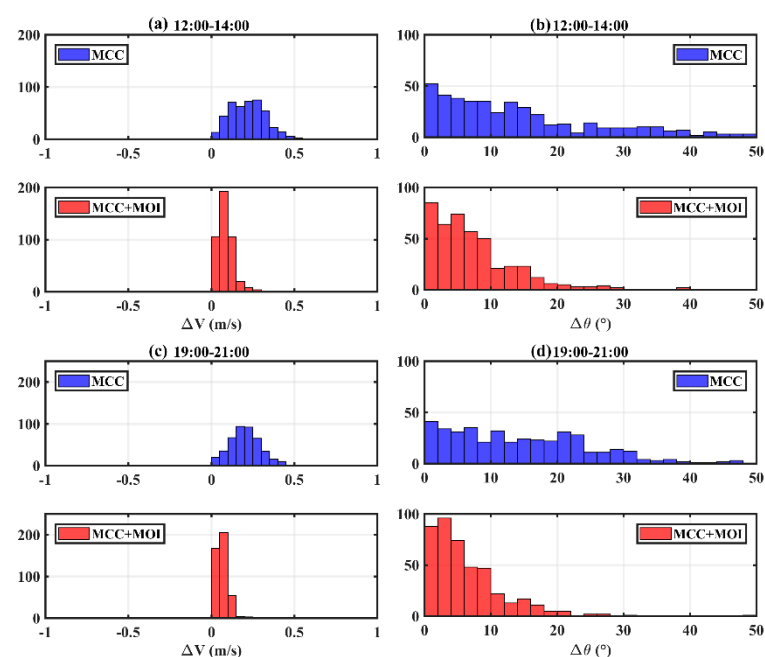

**Figure S9.** Same as Fig. S8, but for 7 October 2011 (during neap tide).

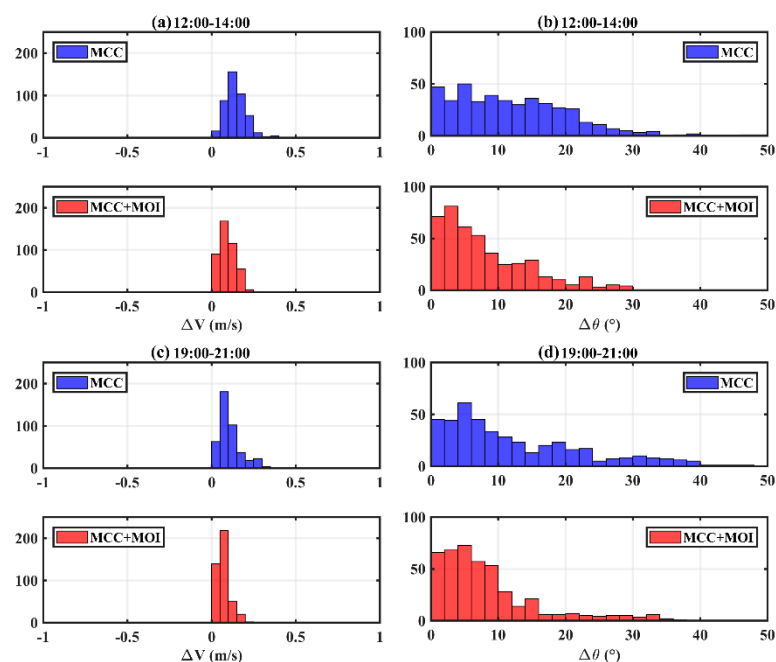

Figure S10. Same as Figure. R9, but for 1 January 2012 (in winter).

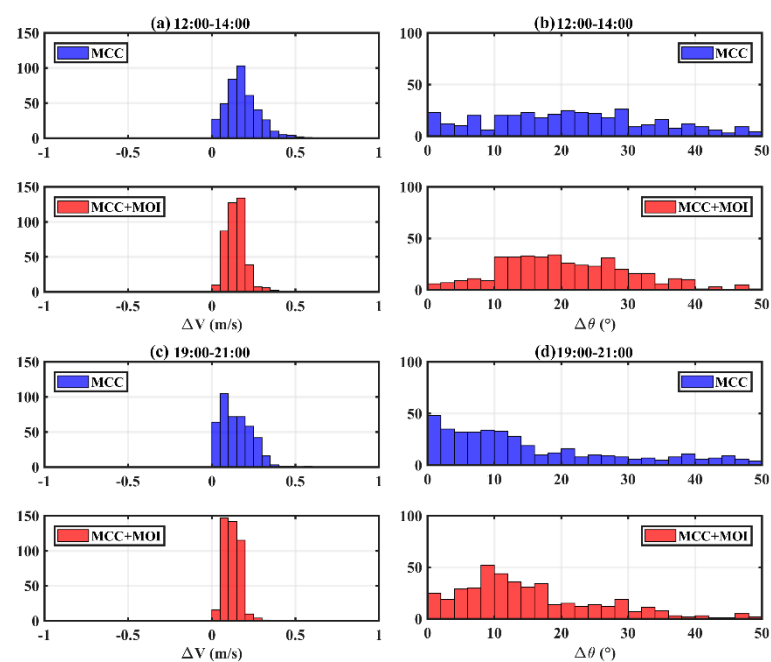

Figure S11. Same as Figure. S8, but for 1 April 2012 (in spring).

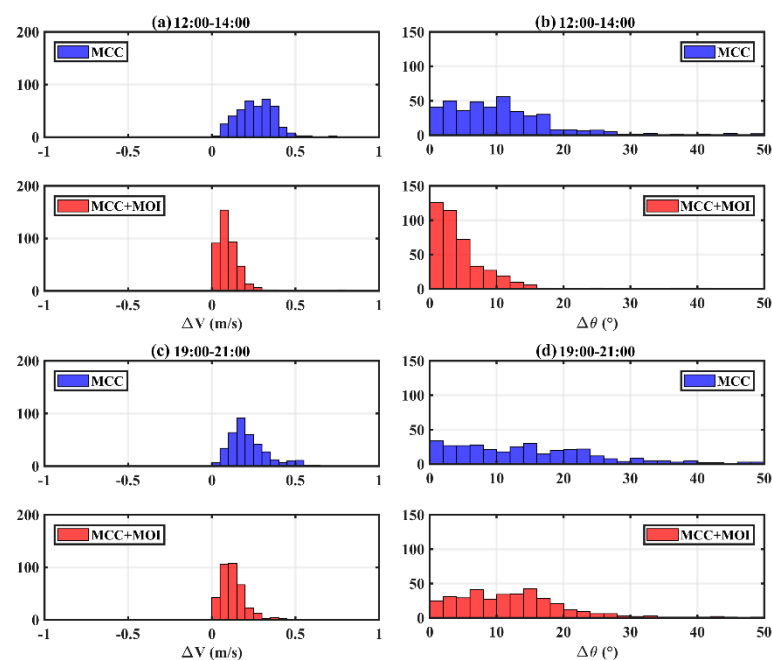

Figure S12. Same as Figure. S8, but for 1 July 2012 (in summer).

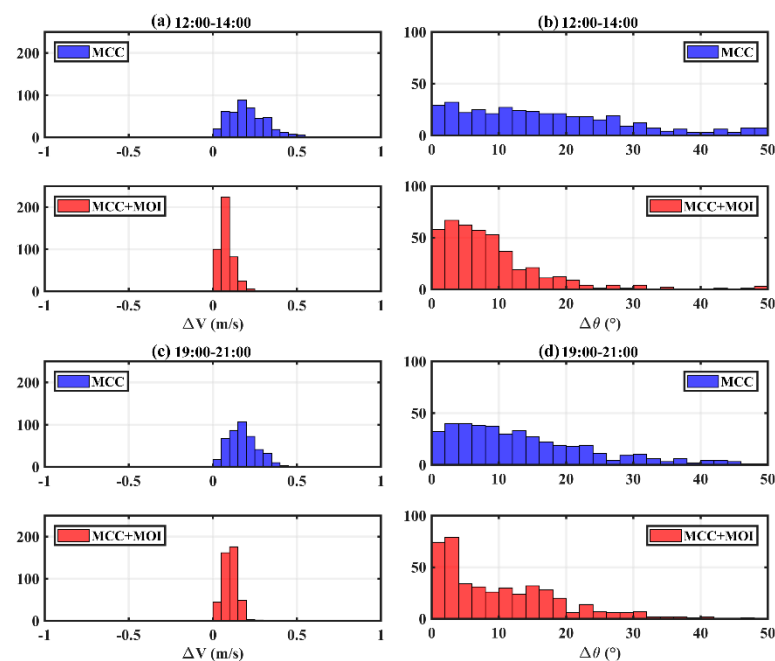

Figure S13. Same as Figure. S8, but for 1 October 2011 (in autumn).



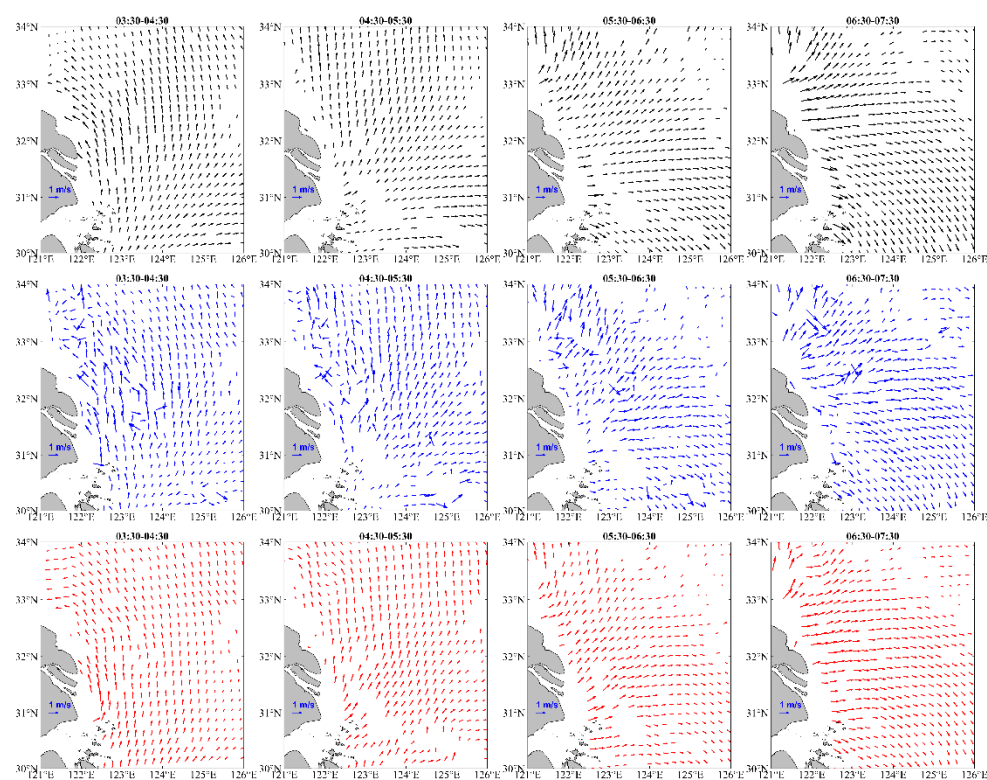

**Figure S14.** Surface currents from OSU model (top), MCC (middle) and MCC+MOI (bottom) for four GOCI image pairs at 03:30-04:30 UTC, 04:30-05:30 UTC, 05:30-06:30 UTC and 06:30-07:30 UTC on 5 April 2011.

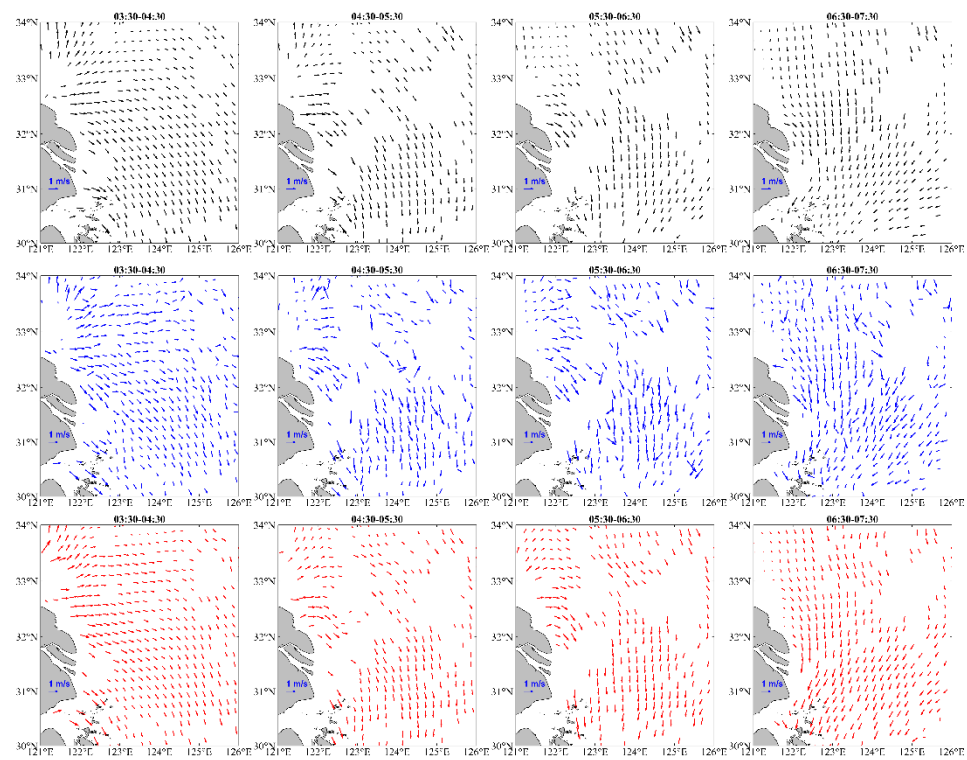

**Figure S15.** Same as Figure. S14, but for 16 September 2013.

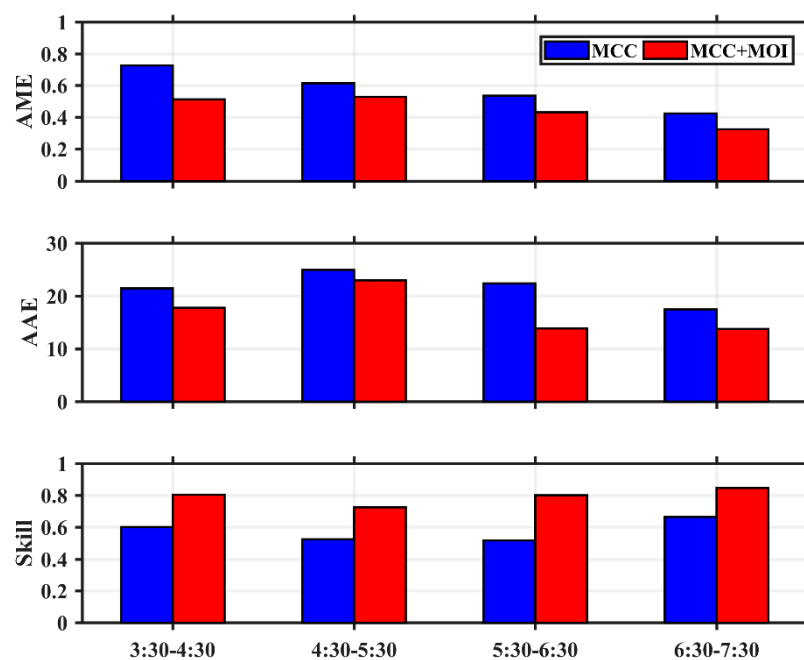

**Figure S16.** Comparison of AME, AAE, and skill for velocities from the OSU model and from GOCI imagery using MCC and MCC+MOI for four different time intervals on 5 April 2011.

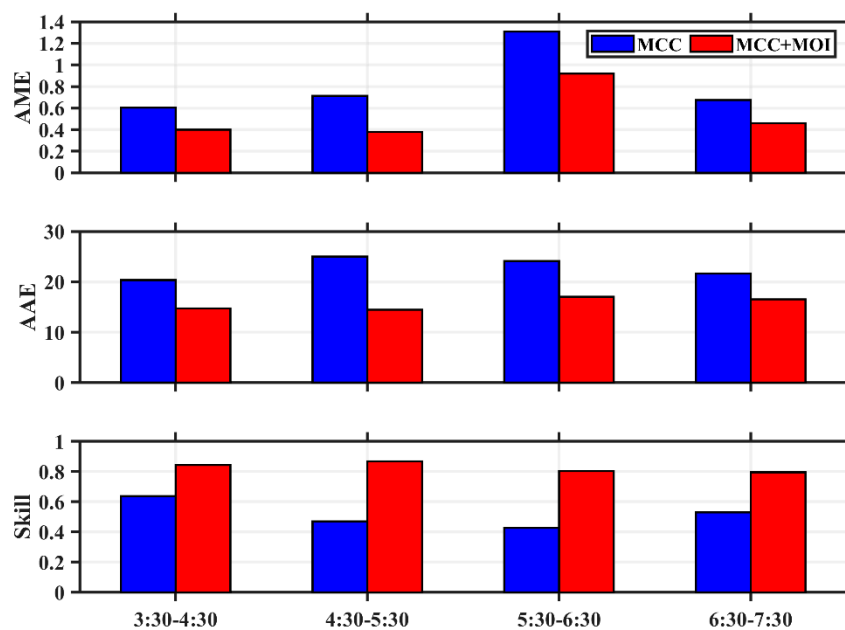

**Figure S17.** Same as Figure S16, but for 16 September 2013.
